# Supplementary material for: Slag-based geopolymer microsphere-supported Cu: a low-cost and sustainable catalyst for CO2 hydrogenation
Source: Royal Society of Chemistry journal article supplement (doi:10.1039/d2se00050d), 2022-01-01
Supplement: d2se00050d1.pdf [file d2se00050d1.pdf]

Supporting Information

## Slag-based geopolymer microsphere-supported Cu: a low-cost and sustainable catalyst for CO<sub>2</sub> hydrogenation

Liang Deng<sup>a</sup>, Qiaoqiao Su<sup>b</sup>, Quan Ye<sup>a</sup>, Hengyu Wan<sup>a</sup>, Yan He<sup>a</sup>, Xuemin Cui<sup>\*a</sup>

<sup>a</sup> School of Chemistry and Chemical Engineering, Guangxi Key Laboratory of Petrochemical  
Resource Processing and Process Intensification Technology, Guangxi University, Nanning

530004, P. R. China

<sup>b</sup> School of Chemistry and Chemical Engineering, Guangxi University for Nationalities,

Nanning 530006, P. R. China

\*Corresponding author, E-mail address: cui-xm@tsinghua.edu.cn (X. Cui)

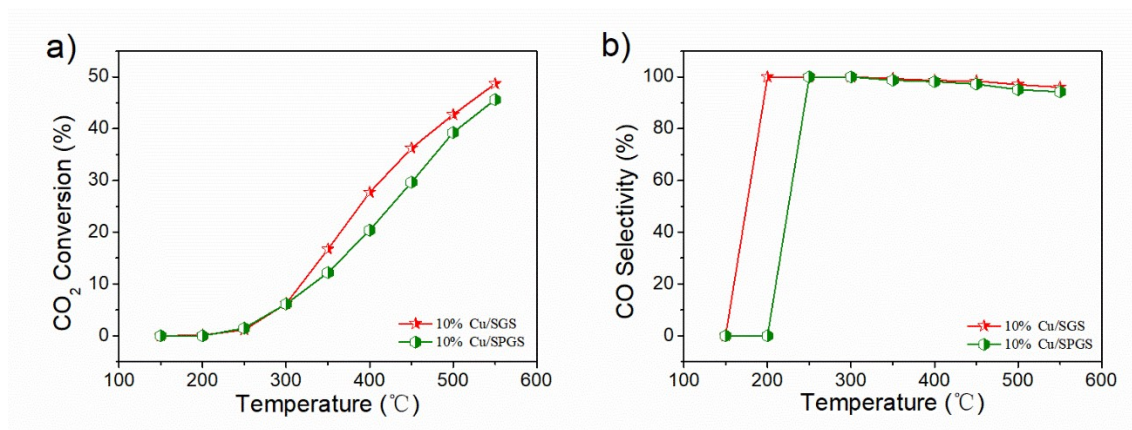

**Fig. S1** (a) CO<sub>2</sub> conversion and (b) CO selectivity of 10% SGS and 10% Cu/SPGS catalysts in the RWGS reaction. (reaction conditions: 0.1 MPa, 150–550 °C, H<sub>2</sub>:CO<sub>2</sub> = 4:1, WHSV = 3600 mL·g<sup>-1</sup>·h<sup>-1</sup>).
